# Supplementary material for: Invasive Disease Caused by Nontypeable Haemophilus influenzae
Source: PubMed Central journal article supplement (PMC4593434; doi:10.3201/eid2110.150004), 2015-10
Supplement: 15-0004-Techapp-s1.pdf [file 15-0004-Techapp-s1.pdf]

# Invasive Disease Caused by Nontypeable *Haemophilus influenzae*

## Technical Appendix

## References

1. Adam HJ, Richardson SE, Jamieson FB, Rawte P, Low DE, Fisman DN. Changing epidemiology of invasive *Haemophilus influenzae* in Ontario, Canada: evidence for herd effects and strain replacement due to Hib vaccination. *Vaccine*. 2010;28:4073–8. [PubMed](#)  
<http://dx.doi.org/10.1016/j.vaccine.2010.03.075>
2. Tsang RS, Sill ML, Skinner SJ, Law DK, Zhou J, Wylie J. Characterization of invasive *Haemophilus influenzae* disease in Manitoba, Canada, 2000–2006: invasive disease due to non-type b strains. *Clin Infect Dis*. 2007;44:1611–4. [PubMed](#)  
<http://dx.doi.org/10.1086/518283>
3. Ladhani S, Slack MP, Heath PT, von Gottberg A, Chandra M, Ramsay ME, et al. Invasive *Haemophilus influenzae* disease, Europe, 1996–2006. *Emerg Infect Dis*. 2010;16:455–63. [PubMed](#) <http://dx.doi.org/10.3201/eid1603.090290>
4. Sandqvist A, Kalies H, Siedler A, Grondahl B, Schmitt HJ, Schweitzer-Krantz S, et al. Invasive nontypeable *Haemophilus influenzae* infections in Germany: a case report of a previously healthy 7-year-old boy with an intracranial abscess, and epidemiological data from 2001 to 2004. *Eur J Pediatr*. 2006;165:658–9. [PubMed](#) <http://dx.doi.org/10.1007/s00431-006-0131-2>
5. Bamberger EE, Ben-Shimol S, Abu Raya B, Katz A, Givon-Lavi N, Dagan R, et al. Pediatric invasive *Haemophilus influenzae* infections in Israel in the era of *Haemophilus influenzae* type b vaccine: a nationwide prospective study. *Pediatr Infect Dis J*. 2014;33:477–81. [PubMed](#) <http://dx.doi.org/10.1097/INF.0000000000000193>
6. Laupland KB, Schonheyder HC, Ostergaard C, Knudsen JD, Valiquette L, Galbraith J, et al. Epidemiology of *Haemophilus influenzae* bacteremia: a multi-national population-based assessment. *J Infect*. 2011;62:142–8. [PubMed](#) <http://dx.doi.org/10.1016/j.jinf.2010.11.009>
7. Bajanca-Lavado MP, Simoes AS, Betencourt CR, Sa-Leao R.; The Portuguese Group for Study of *Haemophilus influenzae* invasive infection. Characteristics of *Haemophilus influenzae* invasive isolates from Portugal following routine childhood vaccination against *H. influenzae*

- serotype b (2002–2010). *Eur J Clin Microbiol Infect Dis*. 2014;33:603–10. [PubMed](#)  
<http://dx.doi.org/10.1007/s10096-013-1994-6>
8. Kastrin T, Paragi M, Kolman J, Cizman M, Kraigher A, Gubina M, et al. Characterisation of invasive *Haemophilus influenzae* isolates in Slovenia, 1993–2008. *Eur J Clin Microbiol Infect Dis*. 2010;29:661–8. [PubMed](#) <http://dx.doi.org/10.1007/s10096-010-0910-6>
  9. García-Cobos S, Arroyo M, Perez-Vazquez M, Aracil B, Lara N, Oteo J, et al. Isolates of beta-lactamase-negative ampicillin-resistant *Haemophilus influenzae* causing invasive infections in Spain remain susceptible to cefotaxime and imipenem. *J Antimicrob Chemother*. 2014;69:111–6. [PubMed](#) <http://dx.doi.org/10.1093/jac/dkt324>
  10. Puig C, Grau I, Marti S, Tubau F, Calatayud L, Pallares R, et al. Clinical and molecular epidemiology of *Haemophilus influenzae* causing invasive disease in adult patients. *PLoS ONE*. 2014;9:e112711. [PubMed](#) <http://dx.doi.org/10.1371/journal.pone.0112711>
  11. Resman F, Ristovski M, Ahl J, Forsgren A, Gilsdorf JR, Jasir A, et al. Invasive disease caused by *Haemophilus influenzae* in Sweden 1997–2009; evidence of increasing incidence and clinical burden of non-type b strains. *Clin Microbiol Infect*. 2011;17:1638–45. [PubMed](#)  
<http://dx.doi.org/10.1111/j.1469-0691.2010.03417.x>
  12. Wang CC, Kuo HY, Chiang DH, Tsai CC, Lin ML, Chan YJ, et al. Invasive *Haemophilus influenzae* disease in adults in Taiwan. *J Microbiol Immunol Infect*. 2008;41:209–14. [PubMed](#) <http://dx.doi.org/10.1111/j.1348-0421.2008.00033.x>
  13. Perdue DG, Bulkow LR, Gellin BG, Davidson M, Petersen KM, Singleton RJ, et al. Invasive *Haemophilus influenzae* disease in Alaskan residents aged 10 years and older before and after infant vaccination programs. *JAMA*. 2000;283:3089–94. [PubMed](#)  
<http://dx.doi.org/10.1001/jama.283.23.3089>
  14. O'Neill JM, St Geme JW III, Cutter D, Adderson EE, Anyanwu J, Jacobs RF, et al. Invasive disease due to nontypeable *Haemophilus influenzae* among children in Arkansas. *J Clin Microbiol*. 2003;41:3064–9. [PubMed](#) <http://dx.doi.org/10.1128/JCM.41.7.3064-3069.2003>
  15. Rubach MP, Bender JM, Mottice S, Hanson K, Weng HY, Korgenski K, et al. Increasing incidence of invasive *Haemophilus influenzae* disease in adults, Utah, USA. *Emerg Infect Dis*. 2011;17:1645–50. [PubMed](#) <http://dx.doi.org/10.3201/eid1709.101991>
  16. Dworkin MS, Park L, Borchardt SM. The changing epidemiology of invasive *Haemophilus influenzae* disease, especially in persons >65 years old. *Clin Infect Dis*. 2007;44:810–6. [PubMed](#) <http://dx.doi.org/10.1086/511861>

17. MacNeil JR, Cohn AC, Farley M, Mair R, Baumbach J, Bennett N, et al. Current epidemiology and trends in invasive *Haemophilus influenzae* disease—United States, 1989–2008. *Clin Infect Dis*. 2011;53:1230–6. [PubMed http://dx.doi.org/10.1093/cid/cir735](http://dx.doi.org/10.1093/cid/cir735)
18. Livorsi DJ, Macneil JR, Cohn AC, Bareta J, Zansky S, Petit S, et al. Invasive *Haemophilus influenzae* in the United States, 1999–2008: epidemiology and outcomes. *J Infect*. 2012;65:496–504. [PubMed http://dx.doi.org/10.1016/j.jinf.2012.08.005](http://dx.doi.org/10.1016/j.jinf.2012.08.005)
